# Supplementary material for: Zinc(ii) coordination polymers of tetrakis(4-pyridyl)cyclobutane and various dicarboxylates: Syntheses, structures and luminescent properties
Source: Royal Society of Chemistry journal article supplement (doi:10.1039/c2ce25482d), 2012-01-01
Supplement: c2ce25482d.pdf [file c2ce25482d.pdf]

## Electronic Supplementary Information (ESI)

### **Zinc(II) coordination polymers of tetrakis(4-pyridyl)cyclobutane and various dicarboxylates: syntheses, structures and luminescent properties**

Ming Dai,<sup>a</sup> Wen-Yan Yan,<sup>a</sup> Zhi-Gang Ren,<sup>a</sup> Hui-Fang Wang,<sup>a</sup> Wei-Jie Gong,<sup>a</sup> Fu-Ling Li,<sup>a</sup> Xin Zhao,<sup>a</sup> Hong-Xi Li<sup>a</sup> and Jian-Ping Lang<sup>\*ab</sup>

<sup>a</sup> Key Laboratory of Organic Synthesis of Jiangsu Province, College of Chemistry, Chemical Engineering and Materials Science, Soochow University, Suzhou 215123, Jiangsu, P. R. China.

<sup>b</sup> State Key Laboratory of Organometallic Chemistry, Shanghai Institute of Organic Chemistry, Chinese Academy of Sciences, Shanghai 200032, P. R. China

## Table of Contents

**Figure S1.** PXRD patterns for **1-6**. (a) simulated (black) and single-phase polycrystalline sample (red) of **1**. (b) simulated (black) and single-phase polycrystalline sample (red) of **2**. (c) simulated (black) and single-phase polycrystalline sample (red) of **3**. (d) simulated (black) and single-phase polycrystalline sample (red) of **4**. (e) simulated (black) and single-phase polycrystalline sample (red) of **5**. (f) simulated (black) and single-phase polycrystalline sample (red) of **6**. .....S3

**Figure S2.** View of the 3D topological net of **2** looking along the *a* axis. The cyan and red spheres represent Zn centres and tpcb ligands, respectively. ....S5

**Figure S3.** View of the 3D topological net of **3** looking along the *a* axis. The cyan and red spheres represent Zn centres and tpcb ligands, respectively. ....S5

**Figure S4.** View of the 3D topological net of **4** looking along the *a* axis. The cyan and red spheres represent Zn centres and tpcb ligands, respectively. ....S6

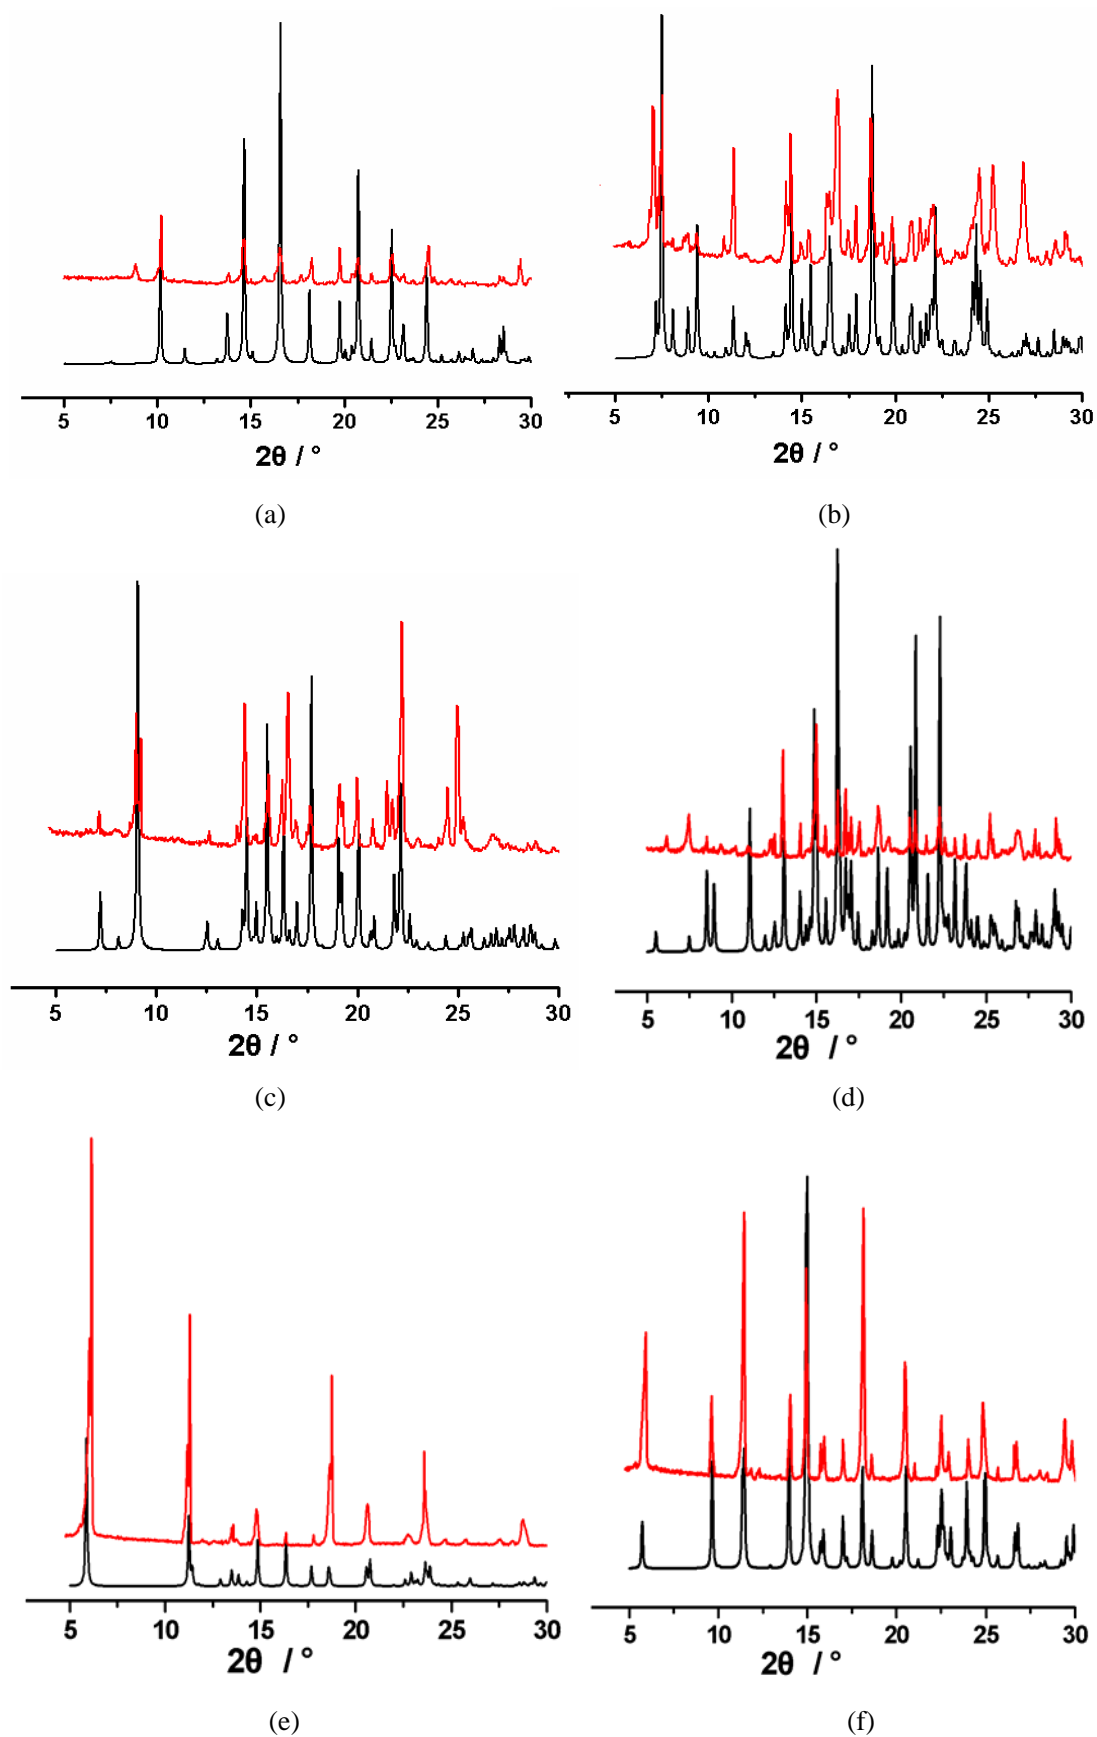

**Figure S1.** PXRD patterns for **1-6**. (a) simulated (black) and single-phase polycrystalline sample

(red) of **1**. (b) simulated (black) and single-phase polycrystalline sample (red) of **2**. (c) simulated (black) and single-phase polycrystalline sample (red) of **3**. (d) simulated (black) and single-phase polycrystalline sample (red) of **4**. (e) simulated (black) and single-phase polycrystalline sample (red) of **5**. (f) simulated (black) and single-phase polycrystalline sample (red) of **6**.

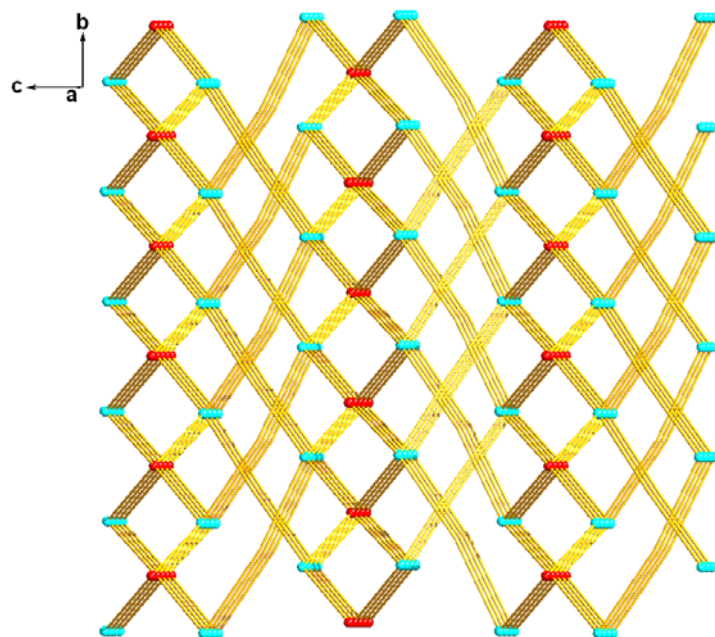

**Figure S2.** View of the 3D topological net of **2** looking along the *a* axis. The cyan and red spheres represent Zn centres and tpcb ligands, respectively.

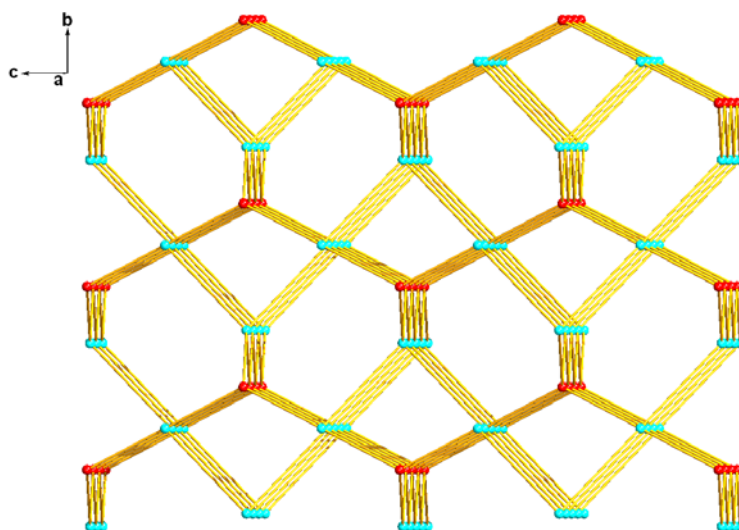

**Figure S3.** View of the 3D topological net of **3** looking along the *a* axis. The cyan and red spheres represent Zn centres and tpcb ligands, respectively.

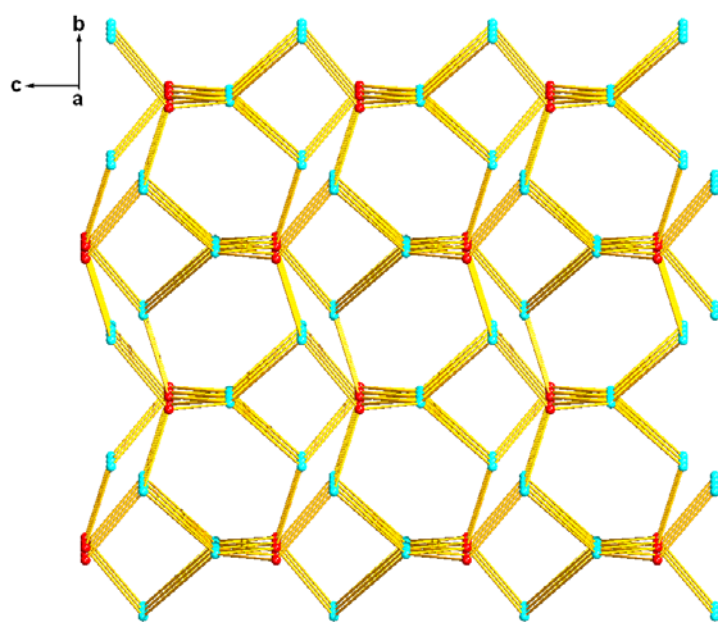

**Figure S4.** View of the 3D topological net of **4** looking along the *a* axis. The cyan and red spheres represent Zn centres and tpcb ligands, respectively.
